# Supplementary material for: Higher quantum efficiency and moisture resistance of all-inorganic halide perovskite nanocrystal films in situ fabricated with cyclodextrin
Source: Royal Society of Chemistry journal article supplement (doi:10.1039/c9cc05755b), 2019-01-01
Supplement: c9cc05755b1.pdf [file c9cc05755b1.pdf]

# Higher Quantum Efficiency and Moisture Resistance of All-Inorganic Halide Perovskite Nanocrystals Film In-situ Fabricated with Cyclodextrin

Author Full Name,\*a Author Full Name b and Author Full Name c

## Chemicals and materials

PbBr<sub>2</sub> (98%,Aladdin), CsBr (99%,Macklin), β-cyclodextrin (β-CD, 99% Aladdin), Dimethyl sulfoxide (DMSO, anhydrous, ≥99.9%, Aladdin), Methanol (99%,Aladdin), Toluene (99.5%,Alfa Aesar) were used as received without further purification

## Preparation of the CsPbBr<sub>3</sub>-β-CD film

CsPbBr<sub>3</sub> precursor solution was prepared by adding CsBr (0.1 mmol) and PbBr<sub>2</sub> (0.1 mmol) in 2 mL DMSO/Methanol(V/V=1:1) solvent. For the CsPbBr<sub>3</sub>:β-CD precursor solution, besides the addition of CsBr (0.1 mmol) and PbBr<sub>2</sub> (0.1 mmol), Different proportions of β-CD were also added into the 2 mL DMSO/Methanol(V/V=1:1) solvent. they were dissolved at ultrasonic for 30 min and stirred for 12 h at room temperature. Glass substrate soaked in Pinaha solution at 60 °C for 30 min, then rinsed with water and dried. After that, substrates were transferred into Spin coater and spin-coated with 100 μL CsPbBr<sub>3</sub> or CsPbBr<sub>3</sub>: β-CD solution (1000 rpm for 30 s and then 2500 rpm for 60 s) at 75 °C by one-step method, and at 15 s before the last spin-coating step, 0.1 mL Toluene solvent was pipetted onto the substrate to wash out the solvent DMSO in the perovskite wet films and induce fast crystallization. Finally, the spin-coated films were annealed at 150 °C for 15 min to remove the residual solvent.

## Characterization

Spin coater (IC5000, Jiangsu Leibo Scientific Instrument Co., Ltd, China) were used for preparation of perovskite film. Powder X-ray diffraction (XRD) patterns were performed on a Jordan Valley EX-Calibur X-ray Diffractometer at 40 kV and 35 mA using Cu Kα radiation, as shown in Figure S2. The morphologies were investigated using a HITACHI SU8220 (Japan) Scanning Electron Microscopy (SEM). Photoluminescence (PL) measurements were

performed using a Fluorescence spectrophotometer F97Pro, (Shanghai Lingguang Technology Co., Ltd.) in ambient conditions. PL quantum yield and time-resolved PL were characterized at room temperature using a Edinburgh Instruments FLS980 fluorescence spectrometer (United Kingdom). Fourier transform infrared (FTIR) spectra were measured by using a Thermo Fisher Scientific Nicolet iS50 (USA). UV-vis absorption spectra were recorded on a FLA6000 (Hangzhou Jingfei Technology Co., Ltd.) spectro- photometer. X-ray photoelectron spectroscopy (XPS) analysis was collected using an Thermo Fisher Scientific ESCALAB250Xi (USA). The TGA was carried out using a TGA/DSC/1600LF (Switzerland) with an operative temperature range 25-1600 °C and 0.1 microgram sensitivity. The samples were heated from 50 to 800 °C, with an increase of 5 °C /min and under nitrogen flux of 40 mL/min.

### Stability test

The prepared film is placed in a constant temperature and humidity chamber LHS-150HC-II (Shanghai Yiheng Scientific Instrument Co., Ltd.) at a controlled temperature of  $27\pm 2$  °C and a controlled humidity of  $80\pm 3\%$ .

**Table S1.** Detailed spectrum information, including emission peaks, FWHM, and QY of the samples with

| $\beta$ -CD concentration (mM) | 0   | 10   | 25   | 50   | 75   |
|--------------------------------|-----|------|------|------|------|
| Absorption (nm)                | 515 | 510  | 508  | 503  | 505  |
| Emission peak (nm)             | /   | 523  | 521  | 519  | 521  |
| FWHM (nm)                      | /   | 19   | 18   | 18   | 19   |
| PLQY (%)                       | 3.2 | 25.5 | 78.8 | 85.3 | 80.2 |

different  $\beta$ -CD concentration.

**Table S2.** Parameters of bi-exponential fitted time-resolved of the tow perovskite films.

| $\beta$ -CD concentration | $A_1$ (%) | $\tau_1$ (ns) | $A_2$ (%) | $\tau_2$ (ns) | $\chi^2$ | $\tau_{avr}$ (ns) |
|---------------------------|-----------|---------------|-----------|---------------|----------|-------------------|
| 25 mM                     | 42.32     | 47.53         | 57.68     | 358.47        | 1.054    | 226.88            |
| 50 mM                     | 31.42     | 58.45         | 68.58     | 567.11        | 1.078    | 407.28            |

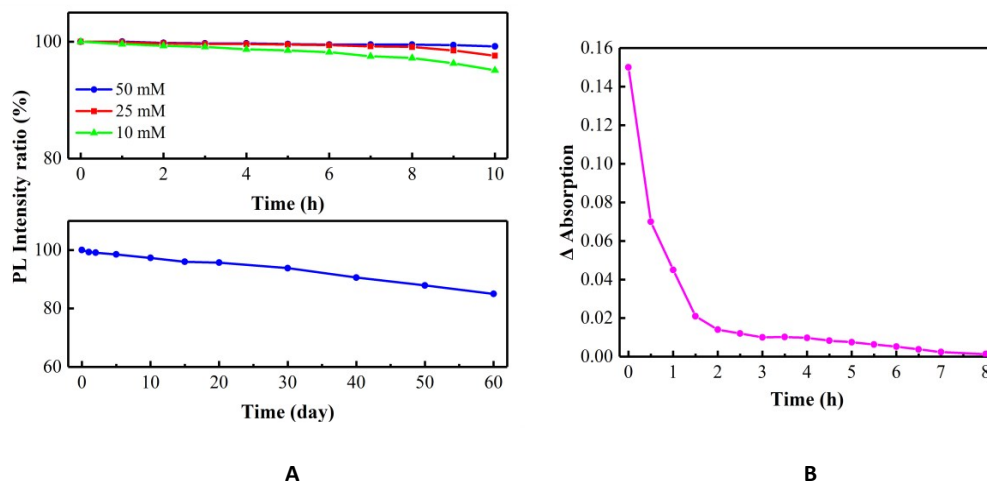

**Fig. S1** PL (A) and UV-Vis (B) intensity change with time of the CsPbBr<sub>3</sub> perovskite film with different  $\beta$ -CD concentration exposing to the moisture with a humidity of 80% ( $\pm$  3%) at room temperature ( $27 \pm 2$  °C).

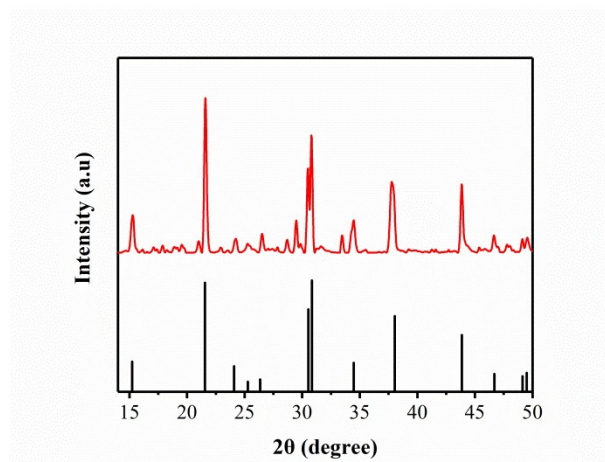

**Fig. S2** XRD patterns of the as-prepared CsPbBr<sub>3</sub> perovskite film (50 mM  $\beta$ -CD, red) and the standard pattern of CsPbBr<sub>3</sub> (PDF#54-0751, black).

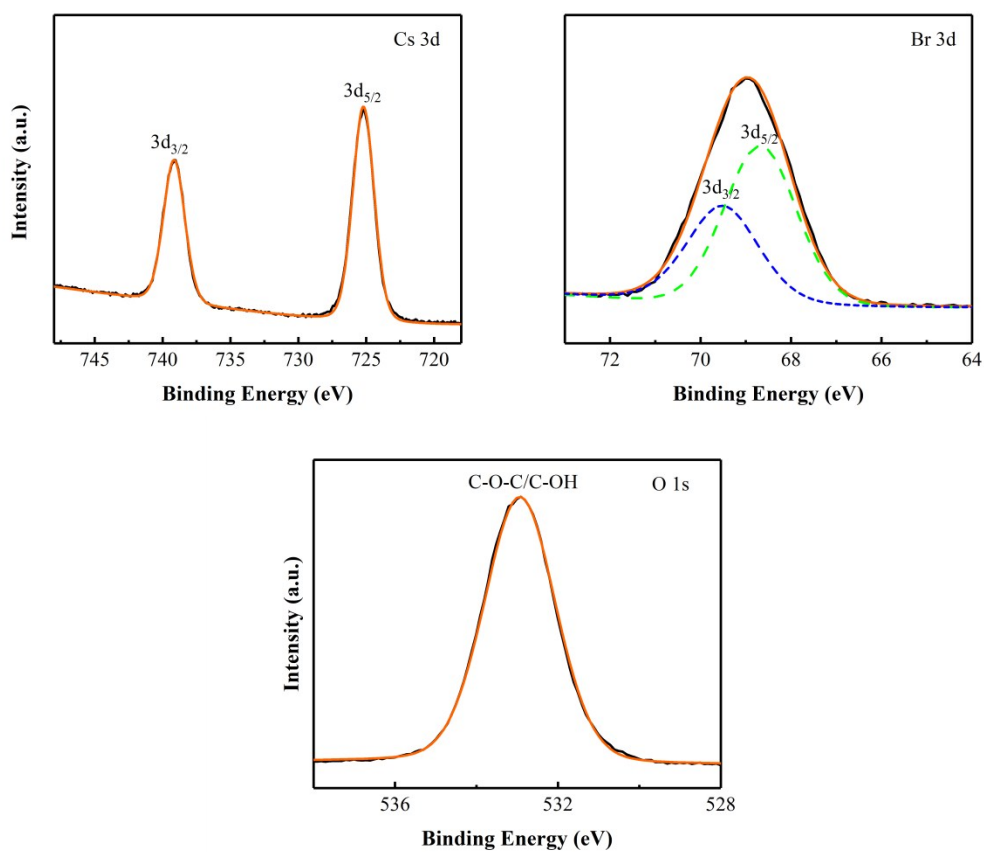

**Fig. S3** XPS spectra with elements Br3d, Cs3d and O1s of the CsPbBr<sub>3</sub> perovskite film (50 mM  $\beta$ -CD).

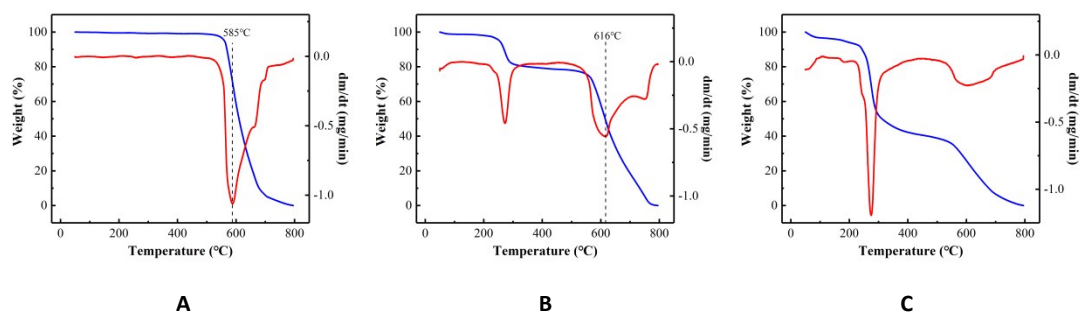

**Fig. S4** TGA heating curves and the corresponding 1st derivative curves of pure CsPbBr<sub>3</sub> (A), 10 mM (B) and 50 mM  $\beta$ -CD (C) encapsulated CsPbBr<sub>3</sub>.
